# Supplementary material for: Transcriptome sequencing to detect the potential role of long non-coding RNAs in bovine mammary gland during the dry and lactation period
Source: BMC Genomics. 2018 Aug 13;19:605. doi: 10.1186/s12864-018-4974-5 (PMC6090732; doi:10.1186/s12864-018-4974-5)
Supplement: Supplementary file 10 — Predicted target genes and mRNAs of DELs (in cis). (XLSX 24 kb) [file 12864_2018_4974_MOESM10_ESM.xlsx]

## Sheet: 11、cis.relation
Additional file 10: Predicted target genes and mRNAs of DELs (in cis)
lncRNA	lnc_symbol	chr	lnc_pos	mRNA_pos	Target mRNA	Target gene_symbol
TCONS_00043261	XLOC_031266	chr15	78440735-78441561	78427798-78435971	XM_003587015.2	LOC100848563
TCONS_00043261	XLOC_031266	chr15	78440735-78441561	78442313-78450583	NM_001098132.1	SLC39A13
TCONS_00043261	XLOC_031266	chr15	78440735-78441561	78427798-78432275	XM_005216522.1	LOC100848563
TCONS_00043261	XLOC_031266	chr15	78440735-78441561	78442284-78450583	XM_005216506.1	SLC39A13
TCONS_00043261	XLOC_031266	chr15	78440735-78441561	78442283-78450583	XM_005216508.1	SLC39A13
TCONS_00043261	XLOC_031266	chr15	78440735-78441561	78442283-78450583	XM_005216507.1	SLC39A13
TCONS_00089340	XLOC_061641	chr23	20685452-20685975	20596998-20683119	NM_001206539.1	CD2AP
TCONS_00071659	XLOC_049769	chr2	24125877-24127052	24131486-24217715	NM_001109981.1	ITGA6
TCONS_00071659	XLOC_049769	chr2	24125877-24127052	24130122-24217909	XM_005202341.1	ITGA6
TCONS_00143059	XLOC_096497	chr6	103423631-103423909	103322139-103539861	NM_174590.3	PTPN13
TCONS_00158691	XLOC_109222	chr9	39263293-39264661	39047795-39260856	XM_005210788.1	FYN
TCONS_00158691	XLOC_109222	chr9	39263293-39264661	39047795-39260856	XM_005210791.1	FYN
TCONS_00158691	XLOC_109222	chr9	39263293-39264661	39186770-39260856	XM_005210790.1	FYN
TCONS_00158691	XLOC_109222	chr9	39263293-39264661	39107807-39259895	NM_001077972.1	FYN
TCONS_00158691	XLOC_109222	chr9	39263293-39264661	39047795-39260856	XM_005210789.1	FYN
TCONS_00112212	XLOC_077251	chr29	37998123-37999049	38005199-38026751	NM_173899.2	CD5
TCONS_00059106	XLOC_041763	chr18	45928015-45928505	45937143-45957028	XM_005219086.1	GRAMD1A
TCONS_00059106	XLOC_041763	chr18	45928015-45928505	45937143-45957028	XM_002694928.3	GRAMD1A
TCONS_00059106	XLOC_041763	chr18	45928015-45928505	45930970-45957028	XM_005219085.1	GRAMD1A
TCONS_00059106	XLOC_041763	chr18	45928015-45928505	45937144-45957028	XM_005219087.1	GRAMD1A
TCONS_00059106	XLOC_041763	chr18	45928015-45928505	45930970-45957028	XM_005219084.1	GRAMD1A
TCONS_00161234	XLOC_111791	chr9	60545491-60546368	60555571-60620636	XM_005210871.1	MAP3K7
TCONS_00161234	XLOC_111791	chr9	60545491-60546368	60555570-60620636	XM_005210870.1	MAP3K7
TCONS_00161234	XLOC_111791	chr9	60545491-60546368	60555573-60620636	XM_005210873.1	MAP3K7
TCONS_00161234	XLOC_111791	chr9	60545491-60546368	60555572-60620636	XM_005210872.1	MAP3K7
TCONS_00161234	XLOC_111791	chr9	60545491-60546368	60555570-60618513	XM_005210874.1	MAP3K7
TCONS_00161234	XLOC_111791	chr9	60545491-60546368	60555709-60620134	NM_001081595.1	MAP3K7
TCONS_00161234	XLOC_111791	chr9	60545491-60546368	60555571-60618513	XM_005210875.1	MAP3K7
TCONS_00143062	XLOC_096500	chr6	103512421-103513480	103322139-103539861	NM_174590.3	PTPN13
TCONS_00105594	XLOC_072778	chr27	15027699-15028046	14906479-15022818	NM_001079787.1	SORBS2
TCONS_00000352	XLOC_000348	chr1	21708680-21710562	21598459-21701063	XM_005201163.1	NRIP1
TCONS_00000352	XLOC_000348	chr1	21708680-21710562	21598069-21701063	XM_005201161.1	NRIP1
TCONS_00000352	XLOC_000348	chr1	21708680-21710562	21598069-21701063	XM_005201160.1	NRIP1
TCONS_00000352	XLOC_000348	chr1	21708680-21710562	21594588-21701063	XM_005201162.1	NRIP1
TCONS_00052847	XLOC_037738	chr17	49895948-49896148	6053467-57592719	NM_001099008.1	BRAP
TCONS_00143060	XLOC_096498	chr6	103484002-103484290	103322139-103539861	NM_174590.3	PTPN13
TCONS_00134592	XLOC_093307	chr5	73903373-73904240	73905260-73946210	XM_005206773.1	TOM1
TCONS_00134592	XLOC_093307	chr5	73903373-73904240	73872708-73901167	NM_001101856.1	HMGXB4
TCONS_00134592	XLOC_093307	chr5	73903373-73904240	73867131-73901169	XM_005206777.1	HMGXB4
TCONS_00134592	XLOC_093307	chr5	73903373-73904240	73866750-73901169	XM_005206776.1	HMGXB4
TCONS_00134592	XLOC_093307	chr5	73903373-73904240	73867130-73901169	XM_005206775.1	HMGXB4
TCONS_00134592	XLOC_093307	chr5	73903373-73904240	73872434-73901169	XM_005206779.1	HMGXB4
TCONS_00134592	XLOC_093307	chr5	73903373-73904240	73905261-73946210	XM_005206774.1	TOM1
TCONS_00134592	XLOC_093307	chr5	73903373-73904240	73866749-73901169	XM_005206778.1	HMGXB4
TCONS_00134592	XLOC_093307	chr5	73903373-73904240	73905663-73946203	NM_001035015.1	TOM1
TCONS_00140805	XLOC_097296	chr6	23678106-23678511	23557313-23670155	NM_001076409.1	NFKB1
TCONS_00157743	XLOC_107495	chr8	46833374-46834155	46705556-46824295	XM_002689640.3	SMC5
TCONS_00157743	XLOC_107495	chr8	46833374-46834155	46705556-46824295	XM_005210026.1	SMC5
TCONS_00038935	XLOC_026743	chr14	35489002-35490078	35495616-35570692	XM_003586897.2	SULF1
TCONS_00038935	XLOC_026743	chr14	35489002-35490078	35398855-35487180	XM_005215561.1	LOC101906227
TCONS_00141430	XLOC_097906	chr6	62507094-62507650	62509245-62597721	XM_005207913.1	SLC30A9
TCONS_00141430	XLOC_097906	chr6	62507094-62507650	62509245-62597721	XM_002688216.3	SLC30A9
TCONS_00080651	XLOC_055810	chr21	66846912-66847534	66852435-66865386	XM_005222162.1	SLC25A29
TCONS_00080651	XLOC_055810	chr21	66846912-66847534	66817741-66842554	NM_001098081.1	YY1
TCONS_00080651	XLOC_055810	chr21	66846912-66847534	66852435-66858137	XM_005222161.1	SLC25A29
TCONS_00080651	XLOC_055810	chr21	66846912-66847534	66852435-66865682	NM_001077871.1	SLC25A29
TCONS_00066612	XLOC_046610	chr19	53256935-53257933	53161799-53250698	XM_005221205.1	TBC1D16
TCONS_00066612	XLOC_046610	chr19	53256935-53257933	53161799-53250698	XM_005221202.1	TBC1D16
TCONS_00066612	XLOC_046610	chr19	53256935-53257933	53161800-53250698	XM_005221204.1	TBC1D16
TCONS_00066612	XLOC_046610	chr19	53256935-53257933	53161098-53250698	XM_005221203.1	TBC1D16
TCONS_00066612	XLOC_046610	chr19	53256935-53257933	53236095-53250698	XM_005221207.1	TBC1D16
TCONS_00115260	XLOC_079091	chr3	55082327-55083338	55063826-55076595	XM_002686268.3	LOC511531
TCONS_00115260	XLOC_079091	chr3	55082327-55083338	55063826-55076822	XM_005204362.1	LOC511531
TCONS_00072752	XLOC_050805	chr2	90982401-90983210	90987008-90989214	NM_001144091.1	FZD7
TCONS_00048458	XLOC_034899	chr16	72563907-72564390	72570538-72596973	NM_001206019.1	FLVCR1
TCONS_00128429	XLOC_086047	chr4	107477061-107477591	107467965-107473280	XM_005205875.1	GSTK1
TCONS_00128429	XLOC_086047	chr4	107477061-107477591	107468164-107473272	NM_001079616.2	GSTK1
TCONS_00128429	XLOC_086047	chr4	107477061-107477591	107467914-107472830	XM_005205873.1	GSTK1
TCONS_00128429	XLOC_086047	chr4	107477061-107477591	107468113-107473278	XM_005205872.1	GSTK1
TCONS_00128429	XLOC_086047	chr4	107477061-107477591	107468113-107472830	XM_005205871.1	GSTK1
TCONS_00128429	XLOC_086047	chr4	107477061-107477591	107468113-107472700	XM_005205874.1	GSTK1
TCONS_00128429	XLOC_086047	chr4	107477061-107477591	107468113-107473278	XM_005205876.1	GSTK1
TCONS_00100832	XLOC_069223	chr26	13457429-13458126	13383848-13448928	XM_002698379.2	TNKS2
TCONS_00013940	XLOC_011242	chr10	93897780-93898435	93900621-93965136	NM_001206908.1	SEL1L
TCONS_00098466	XLOC_068012	chr25	20082201-20082471	20055300-20076860	XM_003587816.2	SDR42E2
TCONS_00163418	XLOC_112621	chr9	104131224-104131808	69514618-104763842	NM_176872.1	THBS2
TCONS_00163418	XLOC_112621	chr9	104131224-104131808	104123901-104130782	XM_002690397.2	DACT2
TCONS_00137654	XLOC_093536	chr5	84281756-84283041	84286531-84373338	XM_005206936.1	RASSF8
TCONS_00137654	XLOC_093536	chr5	84281756-84283041	84286531-84308915	NM_001024549.2	RASSF8
TCONS_00137654	XLOC_093536	chr5	84281756-84283041	84286531-84308525	XM_005206938.1	RASSF8
TCONS_00137654	XLOC_093536	chr5	84281756-84283041	84286531-84373338	XM_005206937.1	RASSF8
TCONS_00053612	XLOC_038390	chr17	73285929-73286677	73292729-73297355	XM_005218205.1	GSTT4
TCONS_00053612	XLOC_038390	chr17	73285929-73286677	73289381-73290917	XM_002694693.2	LOC789355
TCONS_00053612	XLOC_038390	chr17	73285929-73286677	73290763-73292720	XM_005218281.1	LOC101904076
TCONS_00053612	XLOC_038390	chr17	73285929-73286677	73292733-73297355	NM_001206623.1	GSTT4
TCONS_00052219	XLOC_037096	chr17	11921253-11922932	6053467-57592719	NM_001099008.1	BRAP
TCONS_00052219	XLOC_037096	chr17	11921253-11922932	11923471-12064083	NM_001076292.2	SLC10A7
TCONS_00098250	XLOC_067830	chr25	9971736-9972808	9974878-9976682	XM_002697964.2	SOCS1
TCONS_00040268	XLOC_028558	chr15	43682699-43683139	43668564-43680715	NM_001101205.1	WEE1
TCONS_00040268	XLOC_028558	chr15	43682699-43683139	43668444-43680710	XM_005216049.1	WEE1
TCONS_00040268	XLOC_028558	chr15	43682699-43683139	43668444-43681710	XM_005216050.1	WEE1
TCONS_00040268	XLOC_028558	chr15	43682699-43683139	43668444-43682433	XM_005216048.1	WEE1
TCONS_00148852	XLOC_103064	chr7	51430783-51431673	51438972-51441815	NM_001045875.1	EGR1
TCONS_00148852	XLOC_103064	chr7	51430783-51431673	51421165-51427159	NM_001046325.2	REEP2
TCONS_00148852	XLOC_103064	chr7	51430783-51431673	51421370-51427159	XM_005209419.1	REEP2
TCONS_00148852	XLOC_103064	chr7	51430783-51431673	51421216-51427159	XM_005209420.1	REEP2
TCONS_00024371	XLOC_017280	chr12	25649283-25649896	25362948-25641458	NM_001109962.1	DCLK1
TCONS_00129887	XLOC_089096	chr5	23534494-23535661	23523981-23528860	NM_177523.2	SOCS2
TCONS_00129887	XLOC_089096	chr5	23534494-23535661	23522533-23528861	XM_005206101.1	SOCS2
TCONS_00129887	XLOC_089096	chr5	23534494-23535661	23524678-23528861	XM_005206102.1	SOCS2
TCONS_00027537	XLOC_018913	chr12	35649277-35649988	35630809-35647611	NM_001245926.1	FGF9
TCONS_00093378	XLOC_064279	chr24	31105439-31106213	31019864-31096443	XM_005224072.1	SS18
TCONS_00093378	XLOC_064279	chr24	31105439-31106213	31020260-31096443	XM_005224073.1	SS18
TCONS_00093378	XLOC_064279	chr24	31105439-31106213	31021003-31096443	XM_005224071.1	SS18
TCONS_00093378	XLOC_064279	chr24	31105439-31106213	31020448-31096443	XM_005224075.1	SS18
TCONS_00093378	XLOC_064279	chr24	31105439-31106213	31020468-31096443	XM_005224074.1	SS18
TCONS_00093378	XLOC_064279	chr24	31105439-31106213	31020509-31096443	NM_001098122.1	SS18
TCONS_00087997	XLOC_059463	chr22	58686896-58687472	58693672-58701742	NM_001037487.2	LSM3
TCONS_00157293	XLOC_106341	chr8	96889733-96890389	96706557-96887464	XM_002689908.3	SLC44A1
TCONS_00120917	XLOC_079965	chr3	103726634-103727676	103717760-103724142	XM_002686529.2	LOC782545
TCONS_00145862	XLOC_100354	chr7	53451026-53451497	53446100-53449133	XM_005209429.1	CD14
TCONS_00145862	XLOC_100354	chr7	53451026-53451497	53447569-53448985	NM_174008.1	CD14
TCONS_00145862	XLOC_100354	chr7	53451026-53451497	53455857-53461843	NM_001205514.1	TMCO6
TCONS_00145862	XLOC_100354	chr7	53451026-53451497	53455591-53461673	XM_005209428.1	TMCO6
TCONS_00021973	XLOC_011614	chr11	6763631-6764345	6738846-6758416	XM_005212427.1	IL1R2
TCONS_00021973	XLOC_011614	chr11	6763631-6764345	6715080-6758416	XM_005212425.1	IL1R2
TCONS_00021973	XLOC_011614	chr11	6763631-6764345	6715877-6758416	XM_005212422.1	IL1R2
TCONS_00021973	XLOC_011614	chr11	6763631-6764345	6721485-6757780	NM_001046210.2	IL1R2
TCONS_00021973	XLOC_011614	chr11	6763631-6764345	6708495-6758416	XM_005212424.1	IL1R2
TCONS_00021973	XLOC_011614	chr11	6763631-6764345	6715080-6758416	XM_005212423.1	IL1R2
TCONS_00159090	XLOC_109610	chr9	60624053-60625536	60555571-60620636	XM_005210871.1	MAP3K7
TCONS_00159090	XLOC_109610	chr9	60624053-60625536	60555570-60620636	XM_005210870.1	MAP3K7
TCONS_00159090	XLOC_109610	chr9	60624053-60625536	60555573-60620636	XM_005210873.1	MAP3K7
TCONS_00159090	XLOC_109610	chr9	60624053-60625536	60555572-60620636	XM_005210872.1	MAP3K7
TCONS_00159090	XLOC_109610	chr9	60624053-60625536	60555570-60618513	XM_005210874.1	MAP3K7
TCONS_00159090	XLOC_109610	chr9	60624053-60625536	60555709-60620134	NM_001081595.1	MAP3K7
TCONS_00159090	XLOC_109610	chr9	60624053-60625536	60555571-60618513	XM_005210875.1	MAP3K7
TCONS_00011909	XLOC_009329	chr10	8733488-8734483	8737157-8822375	NM_175803.3	TBCA
TCONS_00143811	XLOC_098567	chr6	103533497-103533759	103322139-103539861	NM_174590.3	PTPN13
TCONS_00143811	XLOC_098567	chr6	103533497-103533759	103526664-103528071	NM_001081738.1	SLC10A6
TCONS_00162716	XLOC_110712	chr9	93063327-93063790	69514618-104763842	NM_176872.1	THBS2
TCONS_00087966	XLOC_059348	chr22	54124414-54125642	54104729-54115738	NM_001034425.1	LZTFL1
TCONS_00047946	XLOC_034473	chr16	52218507-52219359	52188379-52214010	XM_005217071.1	NADK
TCONS_00047946	XLOC_034473	chr16	52218507-52219359	52188379-52218075	XM_005217074.1	NADK
TCONS_00047946	XLOC_034473	chr16	52218507-52219359	52219930-52239544	XM_005217097.1	SLC35E2
TCONS_00047946	XLOC_034473	chr16	52218507-52219359	52222594-52236396	NM_001192646.1	SLC35E2
TCONS_00047946	XLOC_034473	chr16	52218507-52219359	52188379-52214010	XM_005217072.1	NADK
TCONS_00047946	XLOC_034473	chr16	52218507-52219359	52188389-52214010	XM_005217073.1	NADK
TCONS_00047946	XLOC_034473	chr16	52218507-52219359	52203712-52212874	NM_001034445.1	NADK
TCONS_00121093	XLOC_080385	chr3	113693860-113694470	113703382-113783352	NM_001035282.2	DGKD
TCONS_00043081	XLOC_031074	chr15	71239431-71240078	71243139-71432651	XM_003587005.2	LRRC4C
TCONS_00043081	XLOC_031074	chr15	71239431-71240078	71243139-72680560	XM_003587006.2	LRRC4C
TCONS_00043081	XLOC_031074	chr15	71239431-71240078	71243139-71597828	XM_005216511.1	LRRC4C
TCONS_00043081	XLOC_031074	chr15	71239431-71240078	71243139-71432651	XM_002693527.3	LRRC4C
TCONS_00043081	XLOC_031074	chr15	71239431-71240078	71243139-71342652	XM_005216513.1	LRRC4C
TCONS_00043081	XLOC_031074	chr15	71239431-71240078	71243139-71282453	XM_005216512.1	LRRC4C
TCONS_00133952	XLOC_092779	chr5	45079068-45079881	45081460-45163715	XM_005206471.1	CPM
TCONS_00133952	XLOC_092779	chr5	45079068-45079881	45081460-45158702	XM_003586067.1	CPM
TCONS_00159480	XLOC_110068	chr9	80961254-80962745	80804550-80958887	XM_005210999.1	GPR126
TCONS_00159480	XLOC_110068	chr9	80961254-80962745	69514618-104763842	NM_176872.1	THBS2
TCONS_00159480	XLOC_110068	chr9	80961254-80962745	80804031-80958884	XM_005210998.1	GPR126
TCONS_00159480	XLOC_110068	chr9	80961254-80962745	80804031-80958884	XM_002690290.3	GPR126
NONBTAT012172.2	NONBTAG008165.2	chr20	10430218-10430639	10431452-10441126	NM_001045872.1	CCNB1
NONBTAT012172.2	NONBTAG008165.2	chr20	10430218-10430639	10407093-10425913	NM_001034236.2	CENPH
NONBTAT030128.1	NONBTAG020902.1	chr28	45439524-45439839	45410612-45439846	XM_005226616.1	CXCL12
NONBTAT004732.2	NONBTAG003331.2	chr12	69740979-69741765	69740974-69743309	XM_003586723.2	SOX21
NONBTAT012173.2	NONBTAG008166.2	chr20	10430774-10431313	10431452-10441126	NM_001045872.1	CCNB1
NONBTAT012173.2	NONBTAG008166.2	chr20	10430774-10431313	10407093-10425913	NM_001034236.2	CENPH
NONBTAT025085.2	NONBTAG016733.2	chr9	12322891-12323260	12240406-12867653	XM_002690016.3	KCNQ5
NONBTAT030220.1	NONBTAG012053.2	chr3	32871184-32873533	32851203-32873645	XM_005204218.1	KCNA3
NONBTAT003266.2	NONBTAG002305.2	chr11	24725452-24725658	24707246-24808491	XM_005212658.1	EML4
NONBTAT003266.2	NONBTAG002305.2	chr11	24725452-24725658	24707227-24806736	NM_001193054.1	EML4
NONBTAT003266.2	NONBTAG002305.2	chr11	24725452-24725658	24653793-24808491	XM_005212657.1	EML4
NONBTAT003266.2	NONBTAG002305.2	chr11	24725452-24725658	24707232-24808491	XM_005212656.1	EML4
NONBTAT011338.2	NONBTAG007590.2	chr2	79916533-79916866	79893980-79927182	XM_005202572.1	STAT1
NONBTAT011338.2	NONBTAG007590.2	chr2	79916533-79916866	79886685-79927140	XM_005202573.1	STAT1
NONBTAT011338.2	NONBTAG007590.2	chr2	79916533-79916866	79886685-79927182	XM_005202570.1	STAT1
NONBTAT011338.2	NONBTAG007590.2	chr2	79916533-79916866	79886685-79927140	XM_005202574.1	STAT1
NONBTAT011338.2	NONBTAG007590.2	chr2	79916533-79916866	79894232-79926629	NM_001077900.1	STAT1
NONBTAT011338.2	NONBTAG007590.2	chr2	79916533-79916866	79886685-79927182	XM_005202571.1	STAT1
NONBTAT024315.2	NONBTAG016232.2	chr8	41583038-41583638	41293384-41583639	XM_002689615.2	LOC538070
NONBTAT024315.2	NONBTAG016232.2	chr8	41583038-41583638	41294265-41583639	XM_005209993.1	LOC538070
NONBTAT024315.2	NONBTAG016232.2	chr8	41583038-41583638	41293376-41583639	XM_005209994.1	LOC538070
NONBTAT024315.2	NONBTAG016232.2	chr8	41583038-41583638	41317120-41583639	XM_005209992.1	LOC538070
NONBTAT024315.2	NONBTAG016232.2	chr8	41583038-41583638	41294265-41583639	XM_005209995.1	LOC538070
NONBTAT024315.2	NONBTAG016232.2	chr8	41583038-41583638	41306748-41583639	XM_005209996.1	LOC538070
NONBTAT017008.2	NONBTAG011285.2	chr28	16634077-16635620	16620132-16635970	XM_005226297.1	CDK1
NONBTAT017008.2	NONBTAG011285.2	chr28	16634077-16635620	16620403-16635970	XM_005226299.1	CDK1
NONBTAT017008.2	NONBTAG011285.2	chr28	16634077-16635620	16620268-16633922	NM_174016.2	CDK1
NONBTAT017008.2	NONBTAG011285.2	chr28	16634077-16635620	16577409-16635970	XM_005226298.1	CDK1
NONBTAT017913.2	NONBTAG011861.2	chr3	15367389-15367592	15366040-15375312	XM_005203609.1	FDPS
NONBTAT017913.2	NONBTAG011861.2	chr3	15367389-15367592	15355686-15365645	XM_005203789.1	RUSC1
NONBTAT017913.2	NONBTAG011861.2	chr3	15367389-15367592	15366040-15374035	NM_177497.2	FDPS
NONBTAT017913.2	NONBTAG011861.2	chr3	15367389-15367592	15364886-15365833	XM_005203787.1	RUSC1-AS1
NONBTAT017913.2	NONBTAG011861.2	chr3	15367389-15367592	15366040-15375343	XM_005203608.1	FDPS
NONBTAT017913.2	NONBTAG011861.2	chr3	15367389-15367592	15355686-15365645	XM_005203788.1	RUSC1
NONBTAT017913.2	NONBTAG011861.2	chr3	15367389-15367592	15355686-15362058	XM_005203791.1	RUSC1
NONBTAT017913.2	NONBTAG011861.2	chr3	15367389-15367592	15355686-15365645	XM_003585837.2	RUSC1
NONBTAT017913.2	NONBTAG011861.2	chr3	15367389-15367592	15366040-15375180	XM_005203607.1	FDPS
NONBTAT017913.2	NONBTAG011861.2	chr3	15367389-15367592	15355686-15365645	XM_005203790.1	RUSC1
NONBTAT025974.2	NONBTAG017382.2	chr9	97400956-97401434	97398605-97399165	XM_005211098.1	LOC101906344
NONBTAT025974.2	NONBTAG017382.2	chr9	97400956-97401434	97399159-97404521	NM_201527.2	SOD2
NONBTAT025974.2	NONBTAG017382.2	chr9	97400956-97401434	69514618-104763842	NM_176872.1	THBS2
NONBTAT002501.2	NONBTAG001762.2	chr10	67170570-67170935	67154956-67172765	XM_005211859.1	CDKN3
NONBTAT002501.2	NONBTAG001762.2	chr10	67170570-67170935	67155135-67171946	XM_005211860.1	CDKN3
NONBTAT002501.2	NONBTAG001762.2	chr10	67170570-67170935	67154956-67172765	XM_005211857.1	CDKN3
NONBTAT002501.2	NONBTAG001762.2	chr10	67170570-67170935	67176765-67191630	NM_001034739.2	CNIH
NONBTAT002501.2	NONBTAG001762.2	chr10	67170570-67170935	67154968-67171946	XM_005211858.1	CDKN3
NONBTAT002501.2	NONBTAG001762.2	chr10	67170570-67170935	67155091-67171869	NM_001040582.2	CDKN3
NONBTAT004733.2	NONBTAG003331.2	chr12	69740979-69741953	69740974-69743309	XM_003586723.2	SOX21
NONBTAT005038.2	NONBTAG003557.2	chr13	16643573-16644519	16366912-16645422	XM_005214128.1	SFMBT2
NONBTAT005038.2	NONBTAG003557.2	chr13	16643573-16644519	16469743-16645422	XM_005214130.1	SFMBT2
NONBTAT005038.2	NONBTAG003557.2	chr13	16643573-16644519	16471753-16645422	XM_005214129.1	SFMBT2
NONBTAT005038.2	NONBTAG003557.2	chr13	16643573-16644519	16484413-16640879	NM_001205956.1	SFMBT2
NONBTAT005038.2	NONBTAG003557.2	chr13	16643573-16644519	16366912-16645422	XM_005214131.1	SFMBT2
NONBTAT010258.2	NONBTAG006864.2	chr19	43713350-43714106	43721135-43783370	XM_005220678.1	BRCA1
NONBTAT010258.2	NONBTAG006864.2	chr19	43713350-43714106	43713351-43777619	XM_005220677.1	BRCA1
NONBTAT010258.2	NONBTAG006864.2	chr19	43713350-43714106	43713351-43783370	XM_005220680.1	BRCA1
NONBTAT010258.2	NONBTAG006864.2	chr19	43713350-43714106	43713351-43783370	XM_005220679.1	BRCA1
NONBTAT010258.2	NONBTAG006864.2	chr19	43713350-43714106	43713351-43783370	XM_005220676.1	BRCA1
NONBTAT010258.2	NONBTAG006864.2	chr19	43713350-43714106	43714457-43783351	NM_178573.1	BRCA1
NONBTAT003504.2	NONBTAG002478.2	chr11	48872894-48873364	48848624-48905318	NM_205807.3	ST3GAL5
NONBTAT003504.2	NONBTAG002478.2	chr11	48872894-48873364	48848646-48906218	XM_005212746.1	ST3GAL5
NONBTAT007214.2	NONBTAG004987.2	chr15	55211239-55211917	55151010-55203577	XM_005216240.1	SLCO2B1
NONBTAT007214.2	NONBTAG004987.2	chr15	55211239-55211917	55159054-55203577	XM_005216239.1	SLCO2B1
NONBTAT007214.2	NONBTAG004987.2	chr15	55211239-55211917	55151085-55203574	NM_174843.2	SLCO2B1
NONBTAT007214.2	NONBTAG004987.2	chr15	55211239-55211917	55159054-55203577	XM_005216238.1	SLCO2B1
NONBTAT017009.2	NONBTAG011285.2	chr28	16635172-16635994	16620132-16635970	XM_005226297.1	CDK1
NONBTAT017009.2	NONBTAG011285.2	chr28	16635172-16635994	16620403-16635970	XM_005226299.1	CDK1
NONBTAT017009.2	NONBTAG011285.2	chr28	16635172-16635994	16620268-16633922	NM_174016.2	CDK1
NONBTAT017009.2	NONBTAG011285.2	chr28	16635172-16635994	16577409-16635970	XM_005226298.1	CDK1
NONBTAT023989.2	NONBTAG015998.2	chr8	7451965-7452317	7427461-7453906	NM_001013004.1	FDFT1
NONBTAT006513.2	NONBTAG004528.2	chr14	72009758-72009992	71945030-72003561	XM_005215674.1	ESRP1
NONBTAT006513.2	NONBTAG004528.2	chr14	72009758-72009992	71945030-72003379	XM_005215673.1	ESRP1
NONBTAT006513.2	NONBTAG004528.2	chr14	72009758-72009992	71945029-72003342	NM_001193002.1	ESRP1
NONBTAT006513.2	NONBTAG004528.2	chr14	72009758-72009992	71945030-72003379	XM_005215672.1	ESRP1
NONBTAT004735.2	NONBTAG003331.2	chr12	69741131-69741735	69740974-69743309	XM_003586723.2	SOX21
